# Supplementary material for: Overall Survival of Stage III Colon Cancer with Only One Lymph Node Metastasis Is Independently Predicted by Preoperative Carcinoembryonic Antigen Level and Lymph Node Sampling Status
Source: PubMed Central journal article supplement (PMC4575069; doi:10.1371/journal.pone.0137053), 2015-09-18
Supplement: pone.0137053.s001.pdf [file pone.0137053.s001.pdf]

| Sex<br>male=1 | Age | Performance | Survival time | Death=1 | Disease-free<br>time | Recurren=1 | LN number | Grading |
|---------------|-----|-------------|---------------|---------|----------------------|------------|-----------|---------|
| 1             | 81  | 2           | 44            | 0       | 47                   | 1          | 10        | 2       |
| 1             | 71  | 0           | 20            | 1       | 20                   | 0          | 2         | 2       |
| 1             | 59  | 0           | 21            | 1       | 15                   | 1          | 13        | 2       |
| 1             | 83  | 0           | 30            | 0       | 30                   | 0          | 6         | 2       |
| 1             | 73  | 0           | 22            | 1       | 14                   | 1          | 13        | 2       |
| 1             | 76  | 0           | 25            | 1       | 25                   | 0          | 3         | 2       |
| 2             | 62  | 0           | 103           | 0       | 103                  | 0          | 12        | 2       |
| 2             | 61  | 0           | 102           | 0       | 102                  | 0          | 23        | 2       |
| 2             | 68  | 0           | 99            | 0       | 97                   | 0          | 31        | 2       |
| 2             | 69  | 0           | 99            | 0       | 99                   | 0          | 7         | 2       |
| 2             | 48  | 0           | 97            | 0       | 97                   | 0          | 96        | 2       |
| 1             | 78  | 0           | 18            | 0       | 18                   | 1          | 13        | 2       |
| 1             | 63  | 0           | 99            | 0       | 99                   | 0          | 7         | 2       |
| 2             | 50  | 0           | 29            | 1       | 25                   | 1          | 6         | 2       |
| 2             | 53  | 0           | 12            | 1       | 2                    | 1          | 3         | 2       |
| 1             | 72  | 0           | 61            | 0       | 61                   | 0          | 32        | 2       |
| 1             | 57  | 0           | 97            | 0       | 8                    | 1          | 56        | 2       |
| 1             | 76  | 0           | 19            | 1       | 9                    | 1          | 5         | 2       |
| 1             | 53  | 0           | 73            | 0       | 73                   | 0          | 44        | 2       |
| 1             | 74  | 0           | 48            | 0       | 48                   | 0          | 22        | 2       |
| 1             | 68  | 0           | 93            | 0       | 93                   | 0          | 16        | 2       |
| 2             | 63  | 0           | 96            | 0       | 96                   | 0          | 15        | 2       |
| 2             | 66  | 0           | 7             | 1       | 5                    | 1          | 40        | 2       |
| 1             | 62  | 0           | 95            | 0       | 85                   | 1          | 13        | 2       |
| 2             | 56  | 0           | 95            | 0       | 95                   | 0          | 8         | 2       |
| 2             | 48  | 0           | 26            | 1       | 16                   | 1          | 5         | 2       |
| 1             | 56  | 0           | 32            | 1       | 17                   | 1          | 20        | 2       |
| 2             | 76  | 0           | 94            | 0       | 94                   | 0          | 12        | 2       |
| 1             | 58  | 0           | 92            | 0       | 92                   | 0          | 21        | 2       |
| 2             | 63  | 0           | 94            | 0       | 94                   | 0          | 25        | 2       |
| 2             | 79  | 1           | 22            | 0       | 22                   | 0          | 27        | 2       |
| 2             | 59  | 0           | 93            | 0       | 93                   | 0          | 12        | 2       |
| 2             | 51  | 0           | 92            | 0       | 75                   | 1          | 62        | 2       |
| 1             | 55  | 0           | 87            | 0       | 87                   | 0          | 16        | 2       |
| 1             | 54  | 0           | 56            | 1       | 46                   | 1          | 6         | 2       |
| 1             | 51  | 0           | 20            | 1       | 16                   | 1          | 2         | 2       |
| 1             | 53  | 0           | 58            | 0       | 5                    | 1          | 12        | 2       |
| 2             | 75  | 0           | 64            | 0       | 64                   | 0          | 6         | 2       |
| 2             | 68  | 0           | 50            | 0       | 50                   | 0          | 13        | 2       |
| 2             | 64  | 0           | 18            | 1       | 12                   | 1          | 12        | 2       |
| 1             | 57  | 0           | 79            | 0       | 22                   | 1          | 18        | 2       |
| 1             | 50  | 0           | 36            | 1       | 15                   | 1          | 25        | 2       |
| 1             | 74  | 0           | 31            | 1       | 31                   | 0          | 25        | 2       |
| 1             | 56  | 0           | 87            | 0       | 87                   | 0          | 33        | 2       |

|   |    |   |    |   |    |   |    |   |
|---|----|---|----|---|----|---|----|---|
| 2 | 60 | 0 | 13 | 0 | 12 | 1 | 8  | 2 |
| 1 | 60 | 0 | 85 | 0 | 85 | 0 | 12 | 2 |
| 1 | 72 | 0 | 18 | 1 | 12 | 1 | 18 | 2 |
| 1 | 42 | 0 | 84 | 0 | 84 | 0 | 15 | 2 |
| 2 | 67 | 0 | 86 | 0 | 86 | 0 | 8  | 2 |
| 2 | 73 | 0 | 49 | 1 | 39 | 1 | 5  | 2 |
| 2 | 71 | 0 | 0  | 0 | 0  | 0 | 5  | 2 |
| 2 | 67 | 0 | 38 | 1 | 29 | 1 | 17 | 2 |
| 1 | 67 | 0 | 85 | 0 | 85 | 0 | 15 | 3 |
| 1 | 69 | 0 | 74 | 0 | 74 | 0 | 5  | 2 |
| 1 | 46 | 0 | 45 | 1 | 22 | 1 | 11 | 2 |
| 1 | 55 | 0 | 54 | 1 | 42 | 1 | 26 | 2 |
| 2 | 79 | 0 | 82 | 0 | 82 | 0 | 19 | 2 |
| 1 | 54 | 0 | 83 | 0 | 83 | 0 | 13 | 2 |
| 1 | 51 | 0 | 81 | 0 | 81 | 0 | 13 | 2 |
| 2 | 79 | 0 | 38 | 0 | 38 | 0 | 12 | 2 |
| 2 | 64 | 0 | 85 | 0 | 85 | 0 | 10 | 2 |
| 1 | 54 | 0 | 85 | 0 | 85 | 0 | 13 | 2 |
| 2 | 48 | 0 | 69 | 1 | 17 | 1 | 3  | 2 |
| 1 | 52 | 0 | 85 | 0 | 85 | 0 | 11 | 2 |
| 1 | 70 | 0 | 85 | 0 | 85 | 0 | 10 | 2 |
| 1 | 80 | 1 | 2  | 0 | 2  | 0 | 6  | 2 |
| 1 | 76 | 0 | 85 | 0 | 85 | 0 | 5  | 2 |
| 2 | 52 | 0 | 86 | 0 | 86 | 0 | 21 | 2 |
| 1 | 68 | 0 | 6  | 1 | 3  | 1 | 25 | 2 |
| 1 | 62 | 0 | 78 | 0 | 78 | 0 | 7  | 2 |
| 1 | 59 | 0 | 78 | 0 | 78 | 0 | 32 | 2 |
| 1 | 56 | 0 | 76 | 0 | 76 | 0 | 20 | 2 |
| 1 | 74 | 0 | 12 | 0 | 8  | 1 | 1  | 2 |
| 1 | 59 | 0 | 82 | 0 | 10 | 1 | 14 | 2 |
| 1 | 51 | 0 | 47 | 1 | 16 | 1 | 13 | 2 |
| 1 | 62 | 0 | 19 | 0 | 19 | 0 | 15 | 2 |
| 1 | 68 | 0 | 10 | 1 | 6  | 1 | 16 | 2 |
| 2 | 51 | 0 | 81 | 0 | 81 | 0 | 86 | 2 |
| 1 | 60 | 0 | 78 | 0 | 78 | 0 | 4  | 2 |
| 1 | 76 | 0 | 38 | 0 | 38 | 0 | 13 | 2 |
| 2 | 75 | 0 | 40 | 0 | 6  | 1 | 8  | 2 |
| 1 | 76 | 0 | 49 | 1 | 48 | 1 | 19 | 2 |
| 1 | 74 | 0 | 52 | 0 | 38 | 1 | 13 | 2 |
| 2 | 51 | 0 | 64 | 0 | 64 | 0 | 15 | 3 |
| 2 | 74 | 0 | 75 | 0 | 75 | 0 | 28 | 2 |
| 2 | 69 | 0 | 74 | 0 | 74 | 0 | 7  | 2 |
| 2 | 47 | 0 | 74 | 0 | 74 | 0 | 23 | 2 |
| 2 | 68 | 0 | 66 | 0 | 66 | 0 | 14 | 2 |
| 2 | 77 | 0 | 38 | 1 | 38 | 0 | 11 | 2 |
| 2 | 49 | 0 | 54 | 1 | 34 | 1 | 16 | 2 |

|   |    |   |    |   |    |   |    |   |
|---|----|---|----|---|----|---|----|---|
| 1 | 56 | 0 | 75 | 0 | 75 | 0 | 7  | 2 |
| 2 | 60 | 0 | 66 | 0 | 66 | 0 | 13 | 2 |
| 2 | 76 | 0 | 39 | 0 | 39 | 0 | 12 | 2 |
| 2 | 84 | 1 | 20 | 0 | 20 | 0 | 6  | 2 |
| 2 | 52 | 0 | 10 | 0 | 10 | 0 | 18 | 2 |
| 1 | 81 | 0 | 30 | 1 | 27 | 1 | 12 | 2 |
| 1 | 58 | 0 | 4  | 0 | 4  | 0 | 4  | 3 |
| 2 | 44 | 0 | 1  | 0 | 1  | 0 | 45 | 2 |
| 1 | 46 | 0 | 12 | 1 | 10 | 1 | 12 | 2 |
| 2 | 59 | 0 | 11 | 0 | 11 | 0 | 5  | 2 |
| 1 | 70 | 0 | 1  | 0 | 1  | 0 | 20 | 2 |
| 1 | 53 | 0 | 68 | 0 | 68 | 0 | 16 | 2 |
| 1 | 74 | 0 | 72 | 0 | 72 | 0 | 3  | 2 |
| 1 | 68 | 0 | 21 | 1 | 16 | 1 | 10 | 2 |
| 1 | 53 | 0 | 65 | 0 | 65 | 0 | 14 | 2 |
| 2 | 46 | 0 | 68 | 0 | 20 | 1 | 29 | 2 |
| 2 | 86 | 1 | 18 | 1 | 10 | 1 | 9  | 2 |
| 1 | 65 | 0 | 49 | 1 | 26 | 1 | 44 | 2 |
| 1 | 69 | 0 | 68 | 0 | 68 | 0 | 5  | 2 |
| 2 | 52 | 0 | 11 | 1 | 11 | 1 | 14 | 2 |
| 2 | 55 | 0 | 39 | 0 | 18 | 1 | 8  | 2 |
| 1 | 86 | 1 | 22 | 1 | 22 | 1 | 8  | 2 |
| 1 | 86 | 1 | 6  | 1 | 1  | 1 | 9  | 2 |
| 2 | 40 | 0 | 10 | 1 | 10 | 0 | 55 | 2 |
| 1 | 69 | 0 | 67 | 0 | 25 | 1 | 1  | 2 |
| 1 | 89 | 0 | 66 | 1 | 24 | 1 | 16 | 1 |
| 2 | 60 | 0 | 59 | 0 | 59 | 0 | 27 | 2 |
| 2 | 64 | 0 | 36 | 0 | 30 | 1 | 3  | 2 |
| 2 | 75 | 0 | 36 | 0 | 16 | 1 | 19 | 3 |
| 1 | 62 | 0 | 66 | 0 | 66 | 0 | 21 | 2 |
| 1 | 70 | 0 | 38 | 0 | 35 | 1 | 9  | 3 |
| 2 | 57 | 0 | 2  | 0 | 2  | 0 | 29 | 2 |
| 2 | 58 | 0 | 23 | 0 | 23 | 0 | 12 | 2 |
| 1 | 70 | 0 | 65 | 0 | 30 | 1 | 11 | 2 |
| 2 | 62 | 0 | 65 | 0 | 51 | 1 | 5  | 2 |
| 1 | 59 | 0 | 63 | 0 | 36 | 1 | 10 | 2 |
| 2 | 64 | 0 | 62 | 0 | 62 | 0 | 60 | 2 |
| 2 | 94 | 1 | 2  | 0 | 2  | 0 | 14 | 2 |
| 1 | 54 | 0 | 62 | 0 | 62 | 0 | 33 | 2 |
| 1 | 58 | 0 | 24 | 1 | 23 | 1 | 3  | 2 |
| 2 | 55 | 0 | 17 | 0 | 17 | 0 | 16 | 2 |
| 2 | 74 | 0 | 63 | 0 | 63 | 0 | 25 | 2 |
| 1 | 63 | 0 | 9  | 1 | 9  | 1 | 1  | 3 |
| 1 | 74 | 0 | 64 | 0 | 64 | 0 | 14 | 2 |
| 2 | 70 | 0 | 55 | 0 | 55 | 0 | 14 | 2 |
| 1 | 60 | 0 | 58 | 0 | 58 | 0 | 9  | 2 |

|   |    |   |    |   |    |   |    |   |
|---|----|---|----|---|----|---|----|---|
| 1 | 67 | 0 | 63 | 0 | 63 | 0 | 10 | 2 |
| 1 | 57 | 0 | 36 | 1 | 28 | 1 | 16 | 2 |
| 2 | 66 | 0 | 36 | 0 | 36 | 0 | 13 | 2 |
| 2 | 52 | 0 | 61 | 0 | 61 | 0 | 55 | 2 |
| 1 | 80 | 0 | 61 | 0 | 61 | 0 | 12 | 2 |
| 2 | 70 | 0 | 56 | 0 | 19 | 1 | 23 | 2 |
| 1 | 59 | 0 | 60 | 0 | 34 | 1 | 4  | 2 |
| 1 | 85 | 1 | 34 | 0 | 34 | 0 | 30 | 2 |
| 1 | 54 | 0 | 57 | 0 | 57 | 0 | 9  | 2 |
| 1 | 73 | 0 | 61 | 0 | 61 | 0 | 3  | 2 |
| 1 | 60 | 0 | 16 | 1 | 13 | 1 | 16 | 2 |
| 2 | 96 | 2 | 3  | 0 | 3  | 0 | 22 | 2 |
| 1 | 70 | 0 | 33 | 1 | 6  | 1 | 6  | 2 |
| 2 | 58 | 0 | 43 | 1 | 28 | 1 | 31 | 2 |
| 2 | 66 | 0 | 1  | 0 | 1  | 0 | 16 | 2 |
| 1 | 52 | 0 | 58 | 0 | 30 | 1 | 10 | 2 |
| 2 | 39 | 0 | 60 | 0 | 60 | 0 | 3  | 2 |
| 1 | 63 | 0 | 3  | 0 | 3  | 0 | 22 | 2 |
| 2 | 62 | 0 | 58 | 0 | 58 | 0 | 16 | 2 |
| 1 | 69 | 0 | 55 | 0 | 55 | 0 | 25 | 2 |
| 1 | 64 | 0 | 57 | 0 | 57 | 1 | 11 | 2 |
| 2 | 47 | 0 | 55 | 0 | 38 | 0 | 9  | 2 |
| 1 | 55 | 0 | 31 | 1 | 8  | 1 | 35 | 2 |
| 1 | 82 | 0 | 57 | 0 | 57 | 0 | 24 | 2 |
| 2 | 77 | 0 | 50 | 1 | 46 | 1 | 11 | 2 |
| 2 | 77 | 0 | 15 | 1 | 4  | 1 | 10 | 2 |
| 1 | 45 | 0 | 32 | 1 | 11 | 1 | 19 | 2 |
| 1 | 38 | 0 | 19 | 1 | 13 | 1 | 25 | 2 |
| 2 | 82 | 0 | 56 | 0 | 56 | 0 | 16 | 2 |
| 2 | 81 | 0 | 57 | 0 | 57 | 0 | 21 | 2 |
| 1 | 63 | 0 | 54 | 0 | 54 | 0 | 19 | 2 |
| 2 | 34 | 0 | 56 | 0 | 56 | 0 | 17 | 2 |
| 1 | 58 | 0 | 57 | 0 | 21 | 1 | 20 | 2 |
| 1 | 81 | 0 | 19 | 0 | 19 | 0 | 7  | 2 |
| 1 | 60 | 0 | 56 | 0 | 56 | 0 | 10 | 2 |
| 2 | 83 | 0 | 55 | 0 | 55 | 1 | 12 | 2 |
| 2 | 69 | 0 | 55 | 0 | 55 | 0 | 12 | 2 |
| 2 | 51 | 0 | 52 | 0 | 52 | 0 | 45 | 2 |
| 2 | 73 | 0 | 49 | 0 | 49 | 0 | 21 | 3 |
| 1 | 51 | 0 | 49 | 0 | 49 | 0 | 18 | 2 |
| 1 | 63 | 0 | 50 | 0 | 3  | 1 | 8  | 2 |
| 1 | 65 | 0 | 14 | 0 | 14 | 0 | 31 | 2 |
| 2 | 76 | 0 | 51 | 0 | 51 | 0 | 33 | 2 |
| 1 | 77 | 0 | 22 | 1 | 13 | 1 | 11 | 2 |
| 1 | 73 | 0 | 52 | 0 | 52 | 0 | 8  | 2 |
| 1 | 82 | 0 | 51 | 0 | 51 | 0 | 34 | 2 |

|   |    |   |    |   |    |   |    |   |
|---|----|---|----|---|----|---|----|---|
| 1 | 29 | 0 | 25 | 0 | 2  | 1 | 15 | 2 |
| 1 | 74 | 0 | 24 | 1 | 24 | 0 | 9  | 2 |
| 2 | 73 | 0 | 44 | 0 | 44 | 0 | 5  | 2 |
| 1 | 44 | 0 | 28 | 1 | 28 | 0 | 7  | 2 |
| 1 | 80 | 0 | 43 | 0 | 11 | 1 | 73 | 2 |
| 2 | 79 | 0 | 50 | 0 | 50 | 0 | 13 | 2 |
| 1 | 78 | 0 | 3  | 0 | 3  | 0 | 8  | 2 |
| 2 | 65 | 0 | 45 | 0 | 45 | 0 | 23 | 1 |
| 2 | 64 | 0 | 49 | 0 | 49 | 0 | 23 | 2 |
| 1 | 44 | 0 | 48 | 0 | 48 | 0 | 30 | 2 |
| 1 | 71 | 0 | 23 | 0 | 23 | 0 | 16 | 2 |
| 1 | 76 | 0 | 38 | 1 | 21 | 1 | 8  | 2 |
| 2 | 24 | 0 | 13 | 1 | 7  | 1 | 27 | 2 |
| 1 | 51 | 0 | 49 | 0 | 49 | 0 | 12 | 2 |
| 2 | 47 | 0 | 47 | 0 | 47 | 0 | 38 | 2 |
| 2 | 84 | 0 | 48 | 0 | 2  | 1 | 8  | 2 |
| 2 | 77 | 0 | 3  | 0 | 3  | 0 | 15 | 2 |
| 1 | 68 | 0 | 48 | 0 | 48 | 0 | 6  | 2 |
| 1 | 57 | 0 | 21 | 1 | 12 | 1 | 7  | 2 |
| 1 | 73 | 0 | 48 | 0 | 39 | 1 | 5  | 2 |
| 2 | 70 | 0 | 45 | 0 | 45 | 0 | 19 | 2 |
| 2 | 73 | 0 | 17 | 0 | 17 | 0 | 10 | 2 |
| 1 | 60 | 0 | 41 | 0 | 15 | 1 | 6  | 2 |
| 2 | 59 | 0 | 43 | 0 | 43 | 0 | 22 | 2 |
| 1 | 80 | 0 | 4  | 1 | 4  | 0 | 37 | 2 |
| 2 | 75 | 0 | 46 | 0 | 46 | 0 | 15 | 2 |
| 1 | 76 | 0 | 10 | 1 | 3  | 1 | 19 | 2 |
| 2 | 76 | 0 | 13 | 1 | 11 | 1 | 8  | 2 |
| 1 | 77 | 0 | 22 | 0 | 22 | 0 | 9  | 2 |
| 2 | 73 | 0 | 44 | 0 | 44 | 0 | 24 | 2 |
| 1 | 56 | 0 | 44 | 0 | 44 | 0 | 28 | 1 |
| 1 | 35 | 0 | 33 | 0 | 33 | 0 | 7  |   |
| 2 | 87 | 2 | 15 | 1 | 15 | 0 | 14 | 2 |
| 2 | 53 | 0 | 45 | 0 | 45 | 0 | 2  | 2 |
| 2 | 77 | 0 | 43 | 0 | 43 | 0 | 16 | 2 |
| 2 | 62 | 0 | 31 | 1 | 12 | 1 | 17 | 2 |
| 2 | 47 | 0 | 43 | 0 | 43 | 0 | 5  | 2 |
| 2 | 77 | 0 | 6  | 0 | 0  | 1 | 9  | 2 |
| 1 | 56 | 0 | 42 | 0 | 42 | 0 | 39 | 1 |
| 1 | 80 | 0 | 43 | 0 | 43 | 0 | 28 | 2 |
| 1 | 49 | 0 | 42 | 0 | 42 | 0 | 8  | 2 |
| 1 | 67 | 0 | 41 | 0 | 41 | 0 | 29 | 2 |
| 1 | 49 | 0 | 9  | 0 | 9  | 0 | 12 | 2 |
| 2 | 53 | 0 | 33 | 0 | 31 | 1 | 12 | 2 |
| 1 | 52 | 0 | 42 | 0 | 42 | 0 | 8  | 2 |
| 2 | 85 | 1 | 42 | 0 | 42 | 0 | 20 | 2 |

|   |    |   |    |   |    |   |    |   |
|---|----|---|----|---|----|---|----|---|
| 2 | 57 | 0 | 41 | 0 | 41 | 0 | 3  | 2 |
| 2 | 61 | 0 | 42 | 0 | 42 | 0 | 40 | 2 |
| 2 | 80 | 0 | 42 | 0 | 42 | 0 | 33 | 2 |
| 1 | 81 | 0 | 40 | 0 | 40 | 0 | 12 | 2 |
| 2 | 68 | 0 | 38 | 0 | 38 | 0 | 15 | 2 |
| 1 | 64 | 0 | 39 | 0 | 39 | 0 | 10 | 2 |
| 2 | 62 | 0 | 39 | 0 | 39 | 0 | 3  | 2 |
| 2 | 45 | 0 | 36 | 0 | 36 | 0 | 26 | 2 |
| 2 | 70 | 0 | 38 | 0 | 38 | 0 | 17 | 2 |
| 2 | 65 | 0 | 35 | 0 | 35 | 0 | 17 | 1 |
| 1 | 51 | 0 | 37 | 0 | 37 | 0 | 17 | 2 |
| 2 | 71 | 0 | 38 | 0 | 38 | 0 | 14 | 2 |
| 2 | 60 | 0 | 38 | 0 | 38 | 0 | 25 | 2 |
| 2 | 68 | 0 | 12 | 0 | 11 | 1 | 37 | 2 |
| 2 | 83 | 0 | 0  | 1 | 0  | 0 | 6  | 2 |
| 1 | 57 | 0 | 36 | 0 | 36 | 0 | 17 | 2 |
| 2 | 65 | 0 | 37 | 0 | 37 | 0 | 11 | 2 |
| 2 | 51 | 0 | 36 | 0 | 36 | 0 | 7  | 2 |
| 1 | 71 | 0 | 36 | 0 | 36 | 0 | 11 | 2 |
| 1 | 58 | 0 | 36 | 0 | 36 | 0 | 9  | 2 |
| 2 | 81 | 0 | 33 | 0 | 33 | 0 | 9  | 2 |
| 1 | 58 | 0 | 8  | 0 | 8  | 1 | 11 | 2 |
| 1 | 81 | 0 | 32 | 0 | 32 | 0 | 12 | 2 |
| 1 | 54 | 0 | 35 | 0 | 35 | 0 | 8  | 2 |
| 2 | 68 | 0 | 34 | 0 | 34 | 0 | 14 | 2 |
| 2 | 66 | 0 | 34 | 0 | 34 | 0 | 28 | 2 |
| 1 | 26 | 0 | 32 | 0 | 32 | 0 | 8  | 2 |
| 1 | 50 | 0 | 33 | 0 | 33 | 0 | 52 | 2 |
| 2 | 66 | 0 | 30 | 0 | 30 | 0 | 19 | 2 |
| 1 | 59 | 0 | 32 | 0 | 32 | 0 | 30 | 2 |
| 2 | 62 | 0 | 32 | 0 | 32 | 0 | 17 | 2 |
| 1 | 60 | 0 | 17 | 0 | 9  | 1 | 34 | 2 |
| 1 | 87 | 1 | 32 | 0 | 32 | 0 | 18 | 2 |
| 2 | 71 | 0 | 32 | 0 | 32 | 0 | 17 | 2 |
| 1 | 71 | 0 | 13 | 0 | 13 | 0 | 4  | 2 |
| 1 | 80 | 0 | 29 | 0 | 29 | 0 | 28 | 2 |
| 1 | 73 | 0 | 6  | 1 | 6  | 0 | 11 | 2 |
| 1 | 81 | 0 | 6  | 0 | 6  | 0 | 12 | 2 |
| 2 | 89 | 1 | 8  | 0 | 8  | 0 | 8  | 3 |
| 2 | 67 | 0 | 30 | 0 | 30 | 0 | 28 | 2 |
| 1 | 72 | 0 | 29 | 0 | 29 | 1 | 15 | 2 |
| 2 | 77 | 0 | 29 | 0 | 2  | 1 | 20 | 2 |
| 2 | 65 | 0 | 29 | 0 | 5  | 1 | 22 | 2 |
| 1 | 42 | 0 | 29 | 0 | 29 | 0 | 23 | 1 |
| 1 | 66 | 0 | 29 | 0 | 29 | 0 | 12 | 2 |
| 1 | 70 | 0 | 27 | 0 | 27 | 0 | 52 | 2 |

|   |    |   |    |   |    |   |    |   |
|---|----|---|----|---|----|---|----|---|
| 2 | 74 | 0 | 20 | 1 | 15 | 1 | 26 | 2 |
| 2 | 32 | 0 | 29 | 0 | 29 | 0 | 10 | 2 |
| 1 | 85 | 0 | 28 | 0 | 28 | 0 | 11 | 2 |
| 1 | 58 | 0 | 24 | 0 | 24 | 0 | 18 | 2 |
| 1 | 83 | 0 | 27 | 0 | 27 | 0 | 13 | 2 |
| 1 | 80 | 0 | 28 | 0 | 28 | 0 | 22 | 2 |
| 1 | 59 | 0 | 28 | 0 | 10 | 1 | 35 | 2 |
| 1 | 51 | 0 | 26 | 0 | 26 | 0 | 20 | 2 |
| 2 | 66 | 0 | 26 | 0 | 26 | 0 | 14 | 2 |
| 2 | 71 | 0 | 27 | 0 | 22 | 1 | 15 | 2 |
| 2 | 65 | 0 | 23 | 0 | 4  | 1 | 15 | 2 |
| 1 | 36 | 0 | 26 | 0 | 26 | 0 | 36 | 2 |
| 1 | 31 | 0 | 26 | 0 | 26 | 0 | 25 | 2 |
| 1 | 67 | 0 | 26 | 0 | 7  | 1 | 11 | 2 |
| 2 | 76 | 0 | 27 | 0 | 27 | 0 | 12 | 2 |
| 1 | 48 | 0 | 25 | 0 | 25 | 0 | 23 | 2 |
| 2 | 67 | 0 | 26 | 0 | 26 | 0 | 28 | 2 |
| 1 | 62 | 0 | 13 | 0 | 13 | 0 | 10 | 2 |
| 2 | 54 | 0 | 25 | 0 | 25 | 0 | 9  | 2 |
| 2 | 52 | 0 | 7  | 1 | 7  | 1 | 13 | 1 |
| 1 | 64 | 0 | 25 | 0 | 25 | 0 | 13 | 2 |
| 1 | 62 | 0 | 23 | 0 | 23 | 0 | 25 | 2 |
| 1 | 67 | 0 | 23 | 0 | 23 | 0 | 37 | 2 |
| 1 | 58 | 0 | 22 | 0 | 22 | 0 | 20 | 3 |
| 2 | 68 | 0 | 25 | 0 | 17 | 1 | 17 | 2 |
| 2 | 64 | 0 | 15 | 1 | 2  | 1 | 22 | 2 |
| 1 | 57 | 0 | 24 | 0 | 24 | 0 | 16 | 2 |
| 2 | 74 | 0 | 23 | 0 | 23 | 0 | 27 | 2 |
| 2 | 66 | 0 | 22 | 0 | 22 | 0 | 28 | 2 |
| 2 | 35 | 0 | 15 | 0 | 15 | 0 | 22 | 2 |
| 1 | 67 | 0 | 23 | 0 | 7  | 1 | 20 | 2 |
| 1 | 69 | 0 | 15 | 0 | 15 | 0 | 15 | 2 |
| 1 | 74 | 0 | 15 | 1 | 14 | 1 | 10 | 2 |
| 2 | 49 | 0 | 22 | 0 | 22 | 0 | 34 | 2 |
| 1 | 60 | 0 | 23 | 0 | 10 | 1 | 28 | 2 |
| 1 | 57 | 0 | 23 | 0 | 23 | 0 | 16 | 2 |
| 1 | 45 | 0 | 21 | 0 | 21 | 0 | 14 | 2 |
| 1 | 39 | 0 | 22 | 0 | 14 | 1 | 25 | 2 |
| 1 | 84 | 0 | 21 | 0 | 4  | 1 | 19 | 2 |
| 1 | 51 | 0 | 20 | 0 | 20 | 0 | 28 | 2 |
| 1 | 63 | 0 | 22 | 0 | 5  | 1 | 25 | 2 |
| 1 | 62 | 0 | 22 | 0 | 7  | 1 | 3  | 2 |
| 2 | 60 | 0 | 21 | 0 | 21 | 0 | 23 | 2 |
| 1 | 60 | 0 | 20 | 0 | 20 | 0 | 18 | 2 |
| 2 | 55 | 0 | 3  | 0 | 3  | 0 | 24 | 2 |
| 1 | 56 | 0 | 20 | 0 | 20 | 0 | 23 | 2 |

|   |    |   |    |   |    |   |    |   |
|---|----|---|----|---|----|---|----|---|
| 2 | 80 | 0 | 20 | 0 | 20 | 0 | 22 | 2 |
| 2 | 57 | 0 | 20 | 0 | 7  | 1 | 28 | 2 |
| 1 | 69 | 0 | 20 | 0 | 20 | 0 | 20 | 2 |
| 1 | 60 | 0 | 19 | 0 | 19 | 0 | 16 | 2 |
| 2 | 31 | 0 | 17 | 0 | 17 | 0 | 23 | 2 |
| 2 | 68 | 0 | 18 | 0 | 18 | 0 | 12 | 2 |
| 1 | 64 | 0 | 19 | 0 | 17 | 1 | 20 | 2 |
| 2 | 54 | 0 | 18 | 0 | 6  | 1 | 8  | 2 |
| 1 | 52 | 0 | 15 | 0 | 6  | 1 | 29 | 2 |
| 1 | 73 | 0 | 18 | 0 | 18 | 0 | 12 | 2 |
| 1 | 54 | 0 | 18 | 0 | 10 | 1 | 16 | 2 |
| 1 | 64 | 0 | 17 | 0 | 12 | 1 | 10 | 2 |
| 2 | 50 | 0 | 17 | 0 | 17 | 0 | 15 | 2 |
| 2 | 83 | 1 | 15 | 0 | 15 | 0 | 16 | 2 |
| 2 | 61 | 0 | 15 | 0 | 15 | 0 | 35 | 2 |
| 2 | 77 | 0 | 16 | 0 | 16 | 0 | 16 | 2 |
| 2 | 70 | 0 | 17 | 0 | 17 | 0 | 29 | 2 |
| 1 | 75 | 0 | 17 | 0 | 17 | 0 | 18 | 2 |
| 1 | 67 | 0 | 15 | 0 | 2  | 1 | 16 | 2 |
| 1 | 68 | 0 | 15 | 0 | 15 | 0 | 16 | 2 |
| 1 | 70 | 0 | 13 | 0 | 6  | 1 | 19 | 2 |
| 2 | 36 | 0 | 14 | 0 | 14 | 0 | 20 | 2 |
| 1 | 89 | 1 | 15 | 0 | 1  | 1 | 12 | 2 |
| 1 | 68 | 0 | 15 | 0 | 15 | 0 | 11 | 2 |
| 2 | 53 | 0 | 14 | 0 | 14 | 0 | 14 | 2 |
| 2 | 58 | 0 | 14 | 0 | 14 | 0 | 22 | 2 |
| 2 | 32 | 0 | 13 | 0 | 13 | 0 | 50 | 2 |
| 1 | 46 | 0 | 14 | 0 | 14 | 0 | 11 | 2 |
| 1 | 70 | 0 | 13 | 0 | 5  | 1 | 13 | 2 |
| 1 | 78 | 0 | 13 | 0 | 13 | 0 | 15 | 2 |
| 2 | 86 | 1 | 13 | 0 | 11 | 1 | 21 | 2 |
| 2 | 76 | 0 | 13 | 0 | 13 | 0 | 68 | 2 |
| 2 | 47 | 0 | 12 | 0 | 4  | 1 | 20 | 2 |
| 1 | 59 | 0 | 11 | 0 | 11 | 0 | 19 | 2 |
| 1 | 74 | 0 | 13 | 0 | 13 | 0 | 20 | 2 |
| 1 | 57 | 0 | 12 | 0 | 12 | 0 | 15 | 2 |
| 2 | 75 | 0 | 12 | 0 | 12 | 0 | 31 | 2 |
| 1 | 64 | 0 | 12 | 0 | 10 | 1 | 9  | 2 |
| 2 | 58 | 0 | 12 | 0 | 8  | 1 | 32 | 2 |
| 2 | 52 | 0 | 11 | 0 | 11 | 0 | 20 | 2 |
| 1 | 60 | 0 | 12 | 0 | 12 | 0 | 36 | 2 |
| 1 | 50 | 0 | 10 | 0 | 10 | 0 | 17 | 2 |
| 2 | 79 | 0 | 4  | 0 | 4  | 0 | 7  | 2 |



| T1,2=1;<br>T3,4=2 | Intra-tumor<br>invasion | CEA | 0=no chemo;<br>1=5FU;<br>2=oxalip | Tumor site;<br>1=right;<br>2=left,<br>3=Sigmoid |   |
|-------------------|-------------------------|-----|-----------------------------------|-------------------------------------------------|---|
|                   | 2                       | 0   | 4.56                              | 1                                               | 3 |
|                   | 2                       | 1   | 3.03                              | 1                                               | 3 |
|                   | 2                       | 1   | 3.27                              | 1                                               | 2 |
|                   | 2                       | 1   | 1.13                              | 0                                               | 3 |
|                   | 2                       | 1   | 154.8                             | 2                                               | 3 |
|                   | 2                       | 1   | 0.95                              | 1                                               | 2 |
|                   | 2                       | 1   | 3.49                              | 1                                               | 1 |
|                   | 2                       | 1   | 4.69                              | 1                                               | 3 |
|                   | 2                       | 1   | 43.5                              | 1                                               | 2 |
|                   | 2                       | 1   | 9.5                               | 1                                               | 1 |
|                   | 2                       | 1   | 0.57                              | 1                                               | 3 |
|                   | 2                       | 1   | 5.53                              | 1                                               | 2 |
|                   | 2                       | 1   | 3.39                              | 1                                               | 2 |
|                   | 2                       | 0   | 12.5                              | 1                                               | 3 |
|                   | 2                       | 1   | 39.4                              | 2                                               | 1 |
|                   | 2                       | 0   | 3.99                              | 1                                               | 2 |
|                   | 2                       | 1   | 2.41                              | 1                                               | 2 |
|                   | 2                       | 1   | 391.3                             | 1                                               | 1 |
|                   | 2                       | 1   | 3.36                              | 0                                               | 2 |
|                   | 2                       | 1   | 16.9                              | 1                                               | 1 |
|                   | 2                       | 0   | 1.42                              | 1                                               | 2 |
|                   | 2                       | 1   | 56.8                              | 1                                               | 1 |
|                   | 2                       | 1   | 50.1                              | 0                                               | 2 |
|                   | 2                       | 0   | 0.49                              | 0                                               | 1 |
|                   | 2                       | 1   | 11.7                              | 1                                               | 2 |
|                   | 2                       | 1   | 10.5                              | 2                                               | 3 |
|                   | 2                       | 1   | 6.09                              | 1                                               | 2 |
|                   | 2                       | 1   | 14.6                              | 1                                               | 3 |
|                   | 2                       | 1   | 14.6                              | 0                                               | 2 |
|                   | 2                       | 0   | 2.77                              | 0                                               | 2 |
|                   | 2                       | 1   | 6.6                               | 1                                               | 2 |
|                   | 2                       | 1   | 1.01                              | 2                                               | 1 |
|                   | 2                       | 1   | 4.15                              | 1                                               | 2 |
|                   | 1                       | 0   | 2.07                              | 1                                               | 3 |
|                   | 2                       | 1   | 2.47                              | 1                                               | 2 |
|                   | 2                       | 1   | 3.12                              | 0                                               | 3 |
|                   | 2                       | 1   | 9.69                              | 0                                               | 2 |
|                   | 2                       | 1   | 1.67                              | 1                                               | 2 |
|                   | 2                       | 1   | 22.8                              | 0                                               | 2 |
|                   | 2                       | 1   | 536.5                             | 1                                               | 1 |
|                   | 2                       | 1   | 3.45                              | 1                                               | 2 |
|                   | 2                       | 1   | 107.3                             | 1                                               | 1 |
|                   | 2                       | 1   | 5.73                              | 1                                               | 1 |
|                   | 2                       | 0   | 1.49                              | 1                                               | 3 |

|   |   |       |   |   |
|---|---|-------|---|---|
| 2 | 1 | 74    | 1 | 3 |
| 2 | 1 | 2.14  | 0 | 3 |
| 1 | 1 | 3.24  | 1 | 2 |
| 2 | 1 | 1.92  | 0 | 2 |
| 2 | 1 | 398.7 | 1 | 1 |
| 2 | 0 | 7.69  | 1 | 2 |
| 2 | 1 | 139.9 | 0 | 3 |
| 2 | 1 | 5.3   | 1 | 2 |
| 2 | 1 | 4.12  | 1 | 1 |
| 2 | 1 | 4.35  | 0 | 1 |
| 2 | 0 | 3.52  | 0 | 2 |
| 1 | 1 | 2.62  | 1 | 3 |
| 2 | 1 | 2.45  | 0 | 1 |
| 2 | 0 | 2.63  | 2 | 3 |
| 1 | 1 | 3.74  | 1 | 2 |
| 2 | 1 | 6.44  | 1 | 3 |
| 2 | 1 | 1.05  | 0 | 2 |
| 2 | 1 | 3.22  | 0 | 2 |
| 1 | 1 | 2.28  | 1 | 3 |
| 2 | 1 | 2.01  | 1 | 3 |
| 2 | 0 | 1.7   | 2 | 2 |
| 2 | 1 | 3.45  | 0 | 2 |
| 2 | 1 | 1.64  | 1 | 1 |
| 2 | 0 | 12.1  | 0 | 1 |
| 2 | 1 | 90.1  | 0 | 1 |
| 2 | 1 | 6.79  | 0 | 2 |
| 2 | 1 | 2.62  | 1 | 2 |
| 2 | 0 | 2.71  | 1 | 3 |
| 1 | 0 | 6.26  | 1 | 1 |
| 2 | 0 | 1.06  | 2 | 2 |
| 2 | 1 | 5.58  | 1 | 2 |
| 2 | 1 | 14    | 2 | 3 |
| 1 | 1 | 9.43  | 1 | 1 |
| 2 | 0 | 0.32  | 2 | 2 |
| 2 | 1 | 2     | 1 | 1 |
| 2 | 1 | 31.6  | 1 | 3 |
| 2 | 1 | 38715 | 1 | 2 |
| 2 | 0 | 8.8   | 1 | 2 |
| 2 | 1 | 5.85  | 1 | 1 |
| 2 | 1 | 2.6   | 1 | 2 |
| 2 | 0 | 4.65  | 1 | 2 |
| 2 | 1 | 1.88  | 1 | 2 |
| 1 | 1 | 1.31  | 1 | 2 |
| 2 | 1 | 2.26  | 2 | 2 |
| 2 | 0 | 30.9  | 0 | 2 |
| 2 | 0 | 0.51  | 2 | 1 |

|   |   |        |   |   |
|---|---|--------|---|---|
| 2 | 1 | 4.02   | 2 | 3 |
| 2 | 1 | 16.4   | 1 | 2 |
| 2 | 1 | 3.27   | 1 | 1 |
| 2 | 1 | 2.11   | 0 | 2 |
| 2 | 1 | 2.61   | 1 | 3 |
| 1 | 1 | 30.3   | 1 | 2 |
| 2 | 1 | 3525.9 | 0 | 1 |
| 2 | 0 | 2.21   | 0 | 2 |
| 2 | 0 | 2.72   | 1 | 2 |
| 1 | 1 | 17.2   | 1 | 2 |
| 2 | 1 | 2.53   | 0 | 3 |
| 2 | 0 | 2.02   | 0 | 2 |
| 2 | 0 | 0.58   | 1 | 1 |
| 2 | 1 | 247.8  | 1 | 2 |
| 2 | 1 | 3.4    | 0 | 2 |
| 2 | 0 | 2.24   | 0 | 1 |
| 2 | 1 | 3.67   | 1 | 1 |
| 2 | 0 | 0.63   | 1 | 1 |
| 2 | 1 | 1.4    | 1 | 3 |
| 1 | 1 | 1116.9 | 1 | 3 |
| 2 | 0 | 5.43   | 1 | 1 |
| 2 | 1 | 5.83   | 1 | 3 |
| 2 | 0 | 283.7  | 1 | 3 |
| 2 | 1 | 0.1    | 1 | 2 |
| 1 | 1 | 0.92   | 0 | 3 |
| 2 | 1 | 0.7    | 1 | 1 |
| 2 | 1 | 2.38   | 1 | 3 |
| 2 | 1 | 3.83   | 1 | 1 |
| 2 | 1 | 0.1    | 1 | 2 |
| 2 | 1 | 0.7    | 1 | 2 |
| 2 | 0 | 1.27   | 1 | 2 |
| 1 | 1 | 2.02   | 1 | 3 |
| 2 | 0 | 1.02   | 1 | 2 |
| 2 | 1 | 11.3   | 1 | 3 |
| 1 | 1 | 1.35   | 1 | 2 |
| 2 | 0 | 0.1    | 1 | 2 |
| 2 | 1 | 1.89   | 1 | 2 |
| 2 | 1 | 2.21   | 0 | 1 |
| 2 | 1 | 9.92   | 1 | 1 |
| 2 | 1 | 25.7   | 1 | 3 |
| 2 | 0 | 1.5    | 0 | 3 |
| 2 | 0 | 3.25   | 1 | 1 |
| 2 | 1 | 3.28   | 1 | 2 |
| 2 | 1 | 2.01   | 1 | 3 |
| 2 | 0 | 3.21   | 1 | 2 |
| 1 | 0 | 3.24   | 1 | 1 |

|   |   |        |   |   |
|---|---|--------|---|---|
| 2 | 1 | 4.14   | 1 | 1 |
| 2 | 1 | 0.15   | 1 | 2 |
| 2 | 1 | 1.99   | 1 | 2 |
| 2 | 1 | 0.89   | 1 | 1 |
| 2 | 1 | 2.41   | 1 | 1 |
| 2 | 0 | 14.9   | 1 | 1 |
| 2 | 1 | 0.88   | 1 | 3 |
| 2 | 1 | 1.67   | 1 | 2 |
| 2 | 0 | 0.48   | 1 | 1 |
| 2 | 1 | 0.64   | 1 | 1 |
| 2 | 1 | 7035.8 | 1 | 2 |
| 2 | 1 | 3.77   | 0 | 2 |
| 2 | 0 | 3.13   | 2 | 1 |
| 2 | 1 | 6.22   | 1 | 2 |
| 2 | 1 | 27.7   | 0 | 1 |
| 2 | 1 | 38.3   | 1 | 1 |
| 2 | 0 | 0.24   | 1 | 2 |
| 1 | 1 | 4.87   | 1 | 3 |
| 2 | 1 | 2.14   | 1 | 1 |
| 2 | 1 | 1.1    | 1 | 2 |
| 2 | 0 | 2.41   | 2 | 1 |
| 2 | 1 | 0.98   | 1 | 2 |
| 2 | 1 | 9.47   | 2 | 3 |
| 2 | 1 | 2.69   | 1 | 1 |
| 2 | 1 | 1.76   | 2 | 2 |
| 2 | 0 | 16.2   | 2 | 2 |
| 2 | 0 | 1.07   | 1 | 1 |
| 2 | 0 | 12     | 1 | 1 |
| 2 | 1 | 28.6   | 2 | 1 |
| 2 | 0 | 11.4   | 1 | 2 |
| 1 | 1 | 1.09   | 1 | 1 |
| 2 | 1 | 0.1    | 2 | 2 |
| 1 | 0 | 132.4  | 1 | 2 |
| 2 | 1 | 5.23   | 1 | 2 |
| 2 | 1 | 2.1    | 1 | 2 |
| 2 | 0 | 2.62   | 1 | 1 |
| 2 | 0 | 0.82   | 1 | 2 |
| 1 | 1 | 9.98   | 2 | 1 |
| 1 | 1 | 4.33   | 1 | 3 |
| 2 | 0 | 0.11   | 2 | 1 |
| 2 | 1 | 3.64   | 1 | 3 |
| 2 | 0 | 2.98   | 1 | 2 |
| 2 | 0 | 1.78   | 1 | 1 |
| 2 | 1 | 67.5   | 2 | 1 |
| 2 | 0 | 1.81   | 1 | 2 |
| 1 | 1 | 4.1    | 1 | 2 |

|   |   |        |   |   |
|---|---|--------|---|---|
| 2 | 1 | 25.1   | 1 | 1 |
| 2 | 0 | 1.97   | 1 | 1 |
| 2 | 1 | 7.17   | 1 | 1 |
| 2 | 1 | 6.83   | 1 | 2 |
| 2 | 1 | 23.1   | 1 | 1 |
| 2 | 0 | 0.62   | 1 | 1 |
| 2 | 1 | 11.2   | 1 | 1 |
| 2 | 1 | 0.81   | 2 | 2 |
| 2 | 1 | 4.66   | 2 | 2 |
| 2 | 1 | 0.1    | 2 | 1 |
| 2 | 1 | 141.7  | 1 | 2 |
| 2 | 1 | 1      | 2 | 3 |
| 2 | 1 | 1734.8 | 2 | 2 |
| 2 | 1 | 0.71   | 2 | 2 |
| 2 | 1 | 1.09   | 2 | 3 |
| 2 | 1 | 2.32   | 0 | 2 |
| 2 | 1 | 0.53   | 1 | 2 |
| 2 | 1 | 0.71   | 1 | 1 |
| 2 | 1 | 2.2    | 2 | 3 |
| 2 | 0 | 1.31   | 1 | 3 |
| 1 | 1 | 0.1    | 2 | 3 |
| 1 | 0 | 2.45   | 0 | 3 |
| 2 | 1 | 2.43   | 1 | 1 |
| 2 | 1 | 1.92   | 2 | 2 |
| 2 | 1 | 2.55   | 0 | 3 |
| 2 | 1 | 5.92   | 1 | 1 |
| 1 | 1 | 74.7   | 1 | 2 |
| 2 | 1 | 0.89   | 0 | 1 |
| 2 | 1 | 1.08   | 1 | 2 |
| 2 | 0 | 2.75   | 0 | 2 |
| 1 | 1 | 1.05   | 1 | 1 |
| 1 | 1 | 2.8    | 1 | 1 |
| 2 | 0 | 1.23   | 0 | 3 |
| 2 | 1 | 4.4    | 1 | 1 |
| 2 | 1 | 0.75   | 1 | 2 |
| 2 | 1 | 2.31   | 1 | 2 |
| 1 | 1 | 3.72   | 1 | 3 |
| 2 | 1 | 130.7  | 0 | 2 |
| 2 | 1 | 10.1   | 1 | 1 |
| 2 | 1 | 0.97   | 1 | 1 |
| 2 | 1 | 2.04   | 1 | 2 |
| 2 | 1 | 1.11   | 1 | 3 |
| 2 | 1 | 1.12   | 1 | 1 |
| 2 | 1 | 2.42   | 1 | 3 |
| 2 | 1 | 3.68   | 1 | 2 |
| 2 | 1 | 5.71   | 0 | 3 |

|   |   |        |   |   |
|---|---|--------|---|---|
| 2 | 1 | 5.9    | 1 | 2 |
| 2 | 0 | 1.19   | 1 | 3 |
| 2 | 1 | 0.68   | 1 | 1 |
| 2 | 1 | 5.56   | 1 | 1 |
| 2 | 1 | 0.48   | 1 | 2 |
| 2 | 1 | 3.96   | 2 | 2 |
| 2 | 0 | 2.54   | 1 | 2 |
| 2 | 0 | 13.8   | 2 | 3 |
| 2 | 0 | 1.66   | 1 | 1 |
| 2 | 0 | 0.97   | 1 | 1 |
| 2 | 0 | 1.86   | 2 | 2 |
| 2 | 0 | 2.08   | 2 | 1 |
| 2 | 1 | 1.68   | 1 | 2 |
| 2 | 1 | 15     | 1 | 2 |
| 2 | 0 | 4.09   | 0 | 1 |
| 2 | 0 | 4.73   | 1 | 2 |
| 2 | 0 | 4.59   | 1 | 2 |
| 2 | 0 | 1.73   | 1 | 2 |
| 2 | 0 | 0.9    | 1 | 3 |
| 2 | 0 | 1.38   | 1 | 3 |
| 2 | 1 | 15     | 1 | 1 |
| 2 | 0 | 8689.2 | 2 | 3 |
| 2 | 1 | 2.86   | 1 | 2 |
| 2 | 0 | 1.74   | 1 | 3 |
| 2 | 1 | 6.17   | 2 | 3 |
| 2 | 1 | 1.92   | 1 | 3 |
| 2 | 0 | 0.47   | 1 | 1 |
| 2 | 1 | 2.72   | 1 | 2 |
| 2 | 0 | 11.3   | 2 | 2 |
| 2 | 1 | 0.13   | 1 | 2 |
| 2 | 1 | 1.76   | 1 | 2 |
| 2 | 0 | 0.73   | 2 | 3 |
| 1 | 1 | 1.58   | 1 | 1 |
| 2 | 0 | 7.29   | 1 | 3 |
| 2 | 0 | 3.17   | 0 | 1 |
| 1 | 0 | 2.53   | 1 | 3 |
| 2 | 0 | 0.54   | 0 | 1 |
| 1 | 1 | 2.21   | 0 | 1 |
| 2 | 0 | 2.72   | 1 | 3 |
| 2 | 1 | 24.5   | 1 | 1 |
| 2 | 1 | 5.43   | 1 | 2 |
| 2 | 1 | 98.7   | 1 | 3 |
| 2 | 1 | 355.1  | 1 | 1 |
| 2 | 0 | 1.19   | 1 | 1 |
| 1 | 1 | 2.62   | 0 | 2 |
| 2 | 0 | 2.35   | 0 | 3 |

|   |   |      |   |   |
|---|---|------|---|---|
| 2 | 1 | 49.7 | 1 | 2 |
| 2 | 1 | 4.36 | 1 | 1 |
| 2 | 1 | 1.28 | 1 | 2 |
| 1 | 0 | 9.75 | 2 | 1 |
| 2 | 0 | 3.51 | 1 | 3 |
| 1 | 1 | 3.96 | 1 | 3 |
| 1 | 0 | 1.88 | 2 | 1 |
| 1 | 1 | 3.92 | 1 | 1 |
| 2 | 1 | 0.49 | 0 | 2 |
| 2 | 1 | 6.96 | 1 | 2 |
| 2 | 1 | 2.8  | 1 | 2 |
| 2 | 0 | 29.6 | 2 | 3 |
| 2 | 0 | 1.59 | 2 | 1 |
| 2 | 1 | 4.49 | 1 | 1 |
| 2 | 1 | 4.17 | 1 | 1 |
| 2 | 1 | 2.67 | 1 | 1 |
| 2 | 1 | 1.76 | 1 | 2 |
| 1 | 0 | 2.86 | 1 | 3 |
| 1 | 1 | 8.17 | 1 | 2 |
| 2 | 0 | 1339 | 1 | 3 |
| 1 | 0 | 1.23 | 2 | 2 |
| 2 | 0 | 0.97 | 0 | 2 |
| 1 | 1 | 1.89 | 2 | 3 |
| 2 | 1 | 0.44 | 2 | 2 |
| 2 | 1 | 22.1 | 2 | 1 |
| 2 | 1 | 17.7 | 1 | 2 |
| 2 | 1 | 0.1  | 2 | 2 |
| 2 | 1 | 1.24 | 1 | 1 |
| 2 | 0 | 1.9  | 1 | 1 |
| 1 | 0 | 1.46 | 2 | 1 |
| 1 | 0 | 16.5 | 2 | 1 |
| 2 | 0 | 5.8  | 1 | 2 |
| 2 | 1 | 1.5  | 2 | 3 |
| 2 | 1 | 4.9  | 2 | 3 |
| 2 | 1 | 0.3  | 2 | 2 |
| 2 | 1 | 3.44 | 2 | 1 |
| 2 | 1 | 0.1  | 1 | 3 |
| 2 | 1 | 2.24 | 1 | 2 |
| 2 | 1 | 2.45 | 1 | 1 |
| 2 | 0 | 0.43 | 0 | 1 |
| 2 | 0 | 6.08 | 1 | 3 |
| 2 | 1 | 30   | 2 | 2 |
| 2 | 1 | 1.91 | 2 | 3 |
| 2 | 1 | 2.89 | 2 | 1 |
| 1 | 0 | 1.94 | 2 | 3 |
| 1 | 1 | 1.07 | 0 | 1 |

|   |   |       |   |   |
|---|---|-------|---|---|
| 2 | 1 | 52.2  | 2 | 1 |
| 1 | 1 | 1.35  | 1 | 3 |
| 2 | 0 | 3.29  | 2 | 2 |
| 2 | 1 | 2.16  | 0 | 2 |
| 1 | 1 | 1.11  | 2 | 3 |
| 2 | 0 | 0.48  | 2 | 2 |
| 1 | 1 | 3.98  | 1 | 1 |
| 2 | 1 | 10.9  | 1 | 3 |
| 2 | 1 | 4.41  | 2 | 2 |
| 2 | 0 | 1.69  | 1 | 1 |
| 1 | 1 | 0.43  | 2 | 3 |
| 1 | 1 | 7.6   | 2 | 3 |
| 2 | 1 | 0.9   | 2 | 2 |
| 2 | 0 | 0.32  | 0 | 2 |
| 2 | 0 | 3.47  | 0 | 2 |
| 2 | 1 | 28.7  | 1 | 1 |
| 2 | 1 | 1.17  | 2 | 2 |
| 2 | 1 | 0.51  | 1 | 2 |
| 2 | 1 | 1.73  | 2 | 1 |
| 2 | 0 | 4.87  | 1 | 2 |
| 2 | 1 | 275.6 | 1 | 2 |
| 2 | 1 | 0.43  | 2 | 2 |
| 2 | 1 | 56.1  | 1 | 2 |
| 2 | 0 | 1.09  | 1 | 2 |
| 1 | 0 | 0.47  | 2 | 2 |
| 2 | 1 | 1.7   | 2 | 2 |
| 1 | 1 | 1.44  | 1 | 1 |
| 2 | 1 | 1.51  | 1 | 1 |
| 1 | 1 | 7.97  | 2 | 3 |
| 2 | 1 | 143.6 | 1 | 2 |
| 2 | 1 | 0.93  | 1 | 2 |
| 2 | 1 | 2.7   | 1 | 1 |
| 1 | 1 | 23.2  | 1 | 1 |
| 2 | 1 | 3.42  | 0 | 3 |
| 2 | 1 | 0.84  | 1 | 2 |
| 2 | 1 | 1.18  | 2 | 3 |
| 2 | 0 | 9.86  | 1 | 2 |
| 2 | 0 | 3.42  | 2 | 1 |
| 2 | 1 | 0.91  | 2 | 3 |
| 2 | 0 | 9.29  | 1 | 1 |
| 2 | 0 | 1.3   | 0 | 3 |
| 2 | 0 | 2.27  | 1 | 1 |
| 2 | 0 | 0.62  | 1 | 3 |
